# Supplementary figures and images for: Generation of ironized and multivitamin-loaded liposomes using venturi-based rapid expansion of a supercritical solution (Vent-RESS)
Source: Royal Society of Chemistry journal article supplement (doi:10.1039/c9gc04018h), 2020-01-01

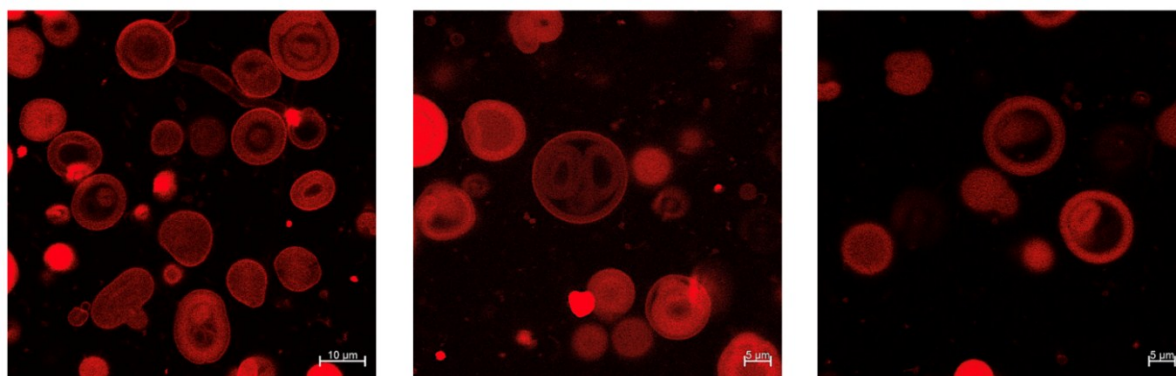

**Figure S1** CLSM images of the liposomes produced at 18 MPa and 60 °C using 39% PC

Supplement: c9gc04018h1.pdf [file c9gc04018h1.pdf]
